# Supplementary material for: CD81 costimulation skews CAR transduction toward naive T cells
Source: PubMed Central journal article supplement — Proc Natl Acad Sci U S A. 2022 Jan 28;119(5):e1910844119. doi: 10.1073/pnas.1910844119 (PMC8812682; doi:10.1073/pnas.1910844119), 2022-01-28
Supplement: pnas.1910844119.sapp.pdf [file pnas.1910844119.sapp.pdf]

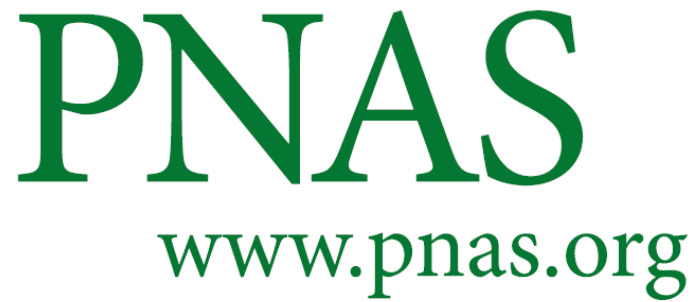

Supplementary Information for

**CD81 costimulation skews CAR transduction toward Naive T cells**

Liora Schultz, Debra Czerwinski, Ronald Levy, Shoshana Levy

Corresponding authors:

Liora Schultz  
Email: [lioras@stanford.edu](mailto:lioras@stanford.edu)

Shoshana Levy  
Email: [slevy@stanford.edu](mailto:slevy@stanford.edu)

**This PDF file includes:**

Figs. S1, S2

## Supplementary Information

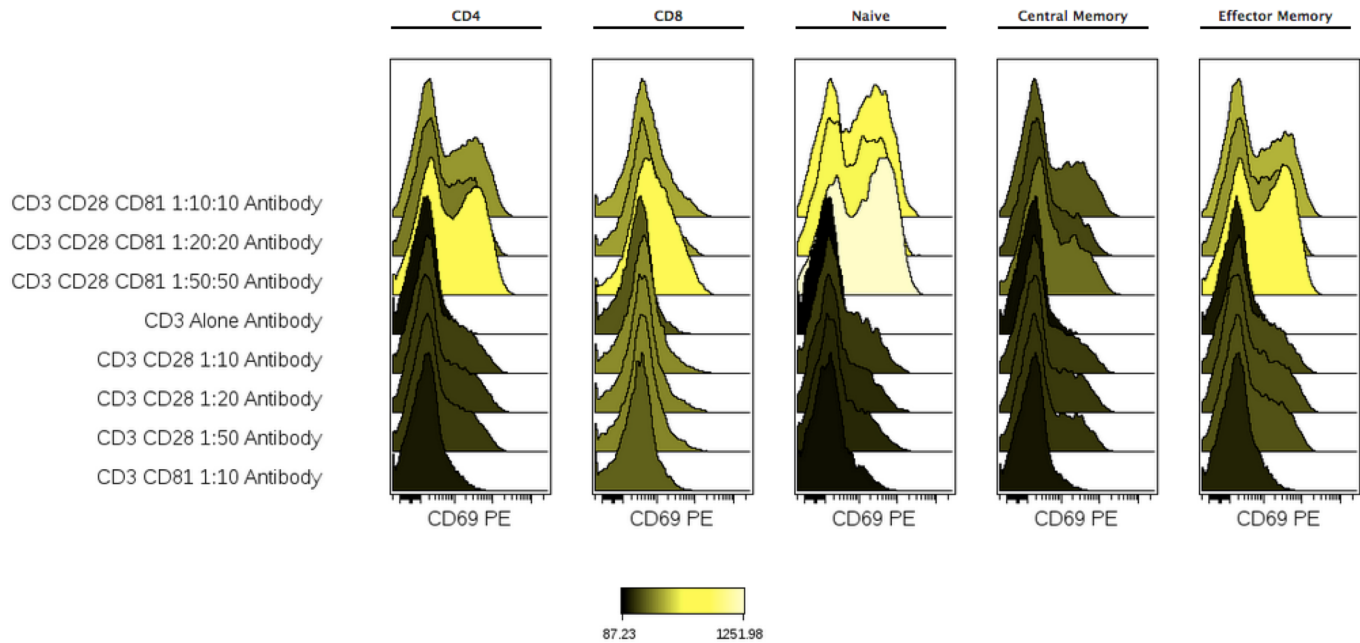

**Fig. S1. Costimulation by CD3/CD28/CD81 as compared to CD3/CD28 induces activation at lower cumulative antibody conditions.**

T cells were activated with varying ratios of the indicated antibodies. CD4, CD8, naive, central memory and effector memory cells were gated as per gating strategy illustrated in Figure 1 and CD69 was used to measure activation.

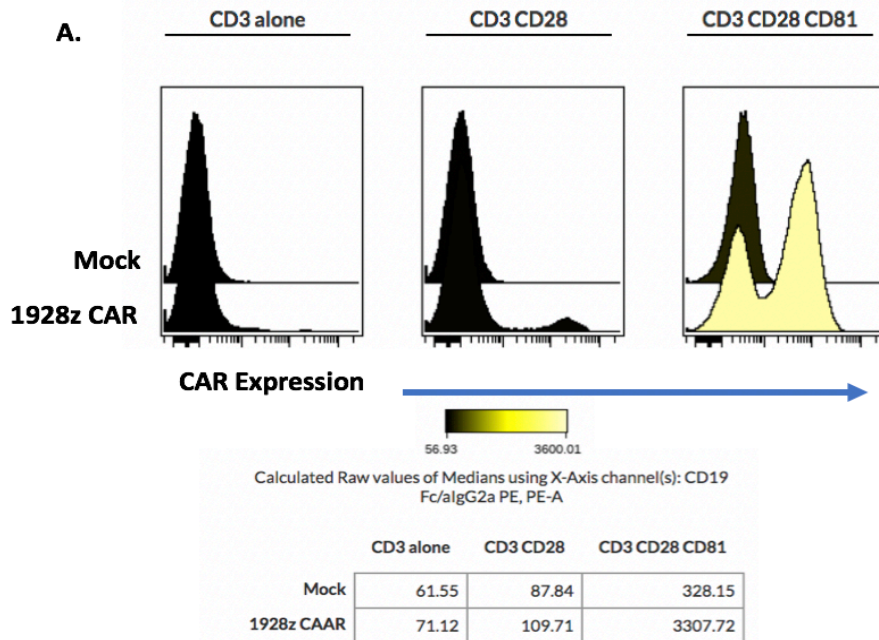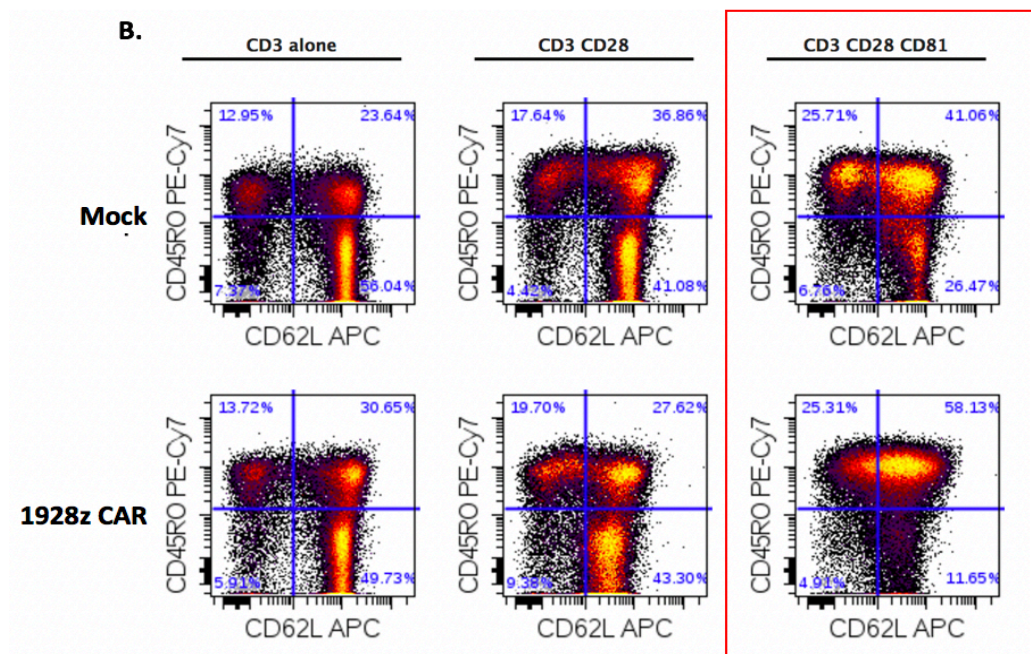

**Fig. S2. CAR activation and transduction processes induce T cell surface remodeling.**

Unselected T cells were activated with indicated conditions and retrovirally transduced to express 1928z CAR. (A) CD19-Fc is used to demonstrate CAR transduction across differentially activated cells. (B) Surface antibody phenotyping illustrate T cell subset distribution following CAR transduction. Phenotype shifts in CAR T cells costimulated with CD81 are outlined in red. Data representative of 3 experiments.
